# Supplementary material
Source: MDPI journal article supplement (https://www.mdpi.com/1424-8247/16/4/621)
Supplement: s1 [file s1]

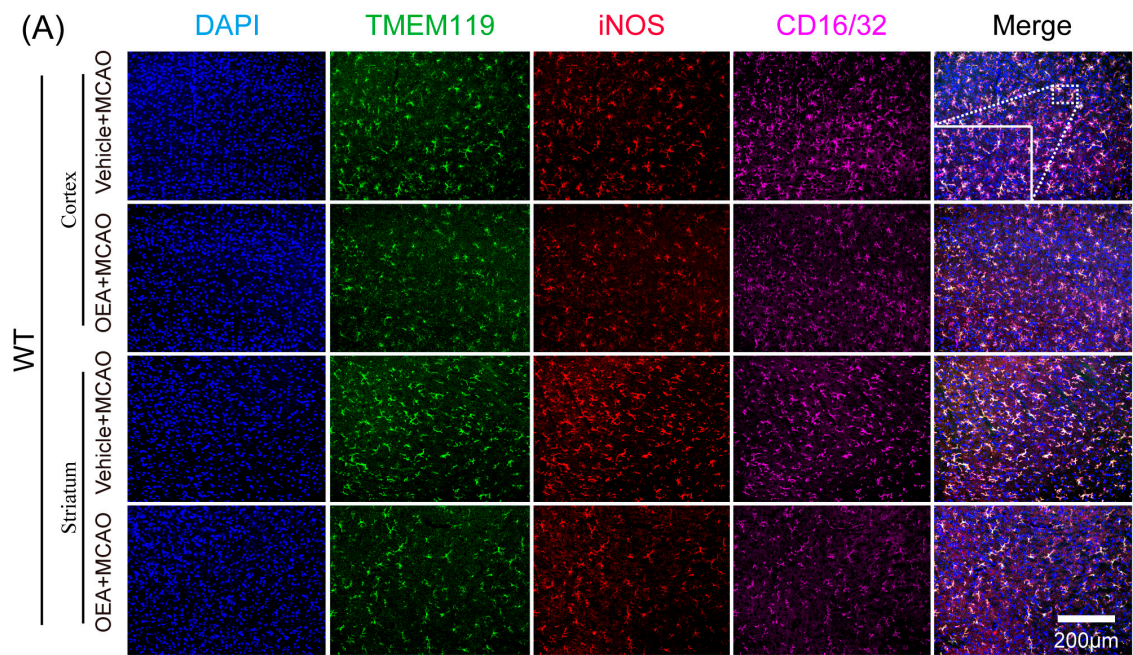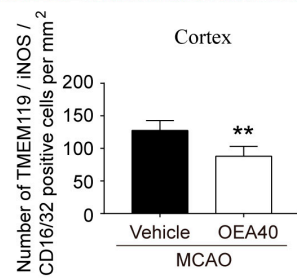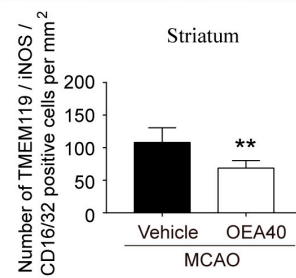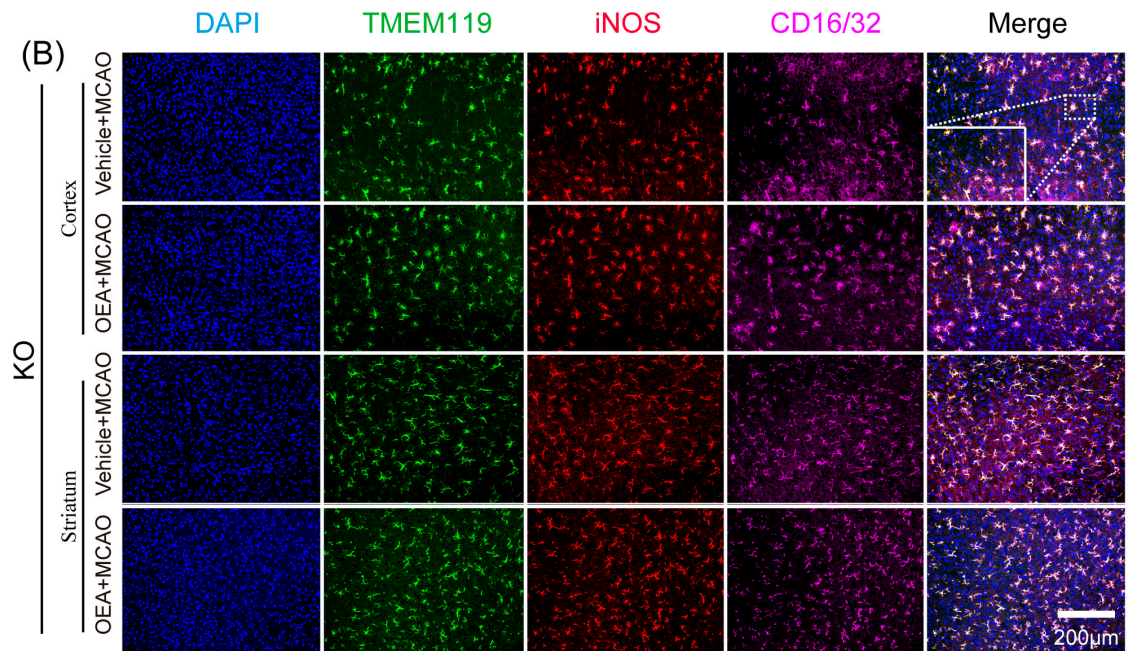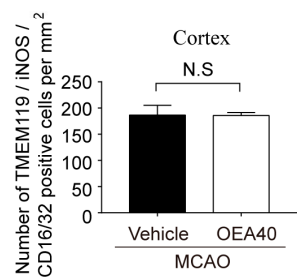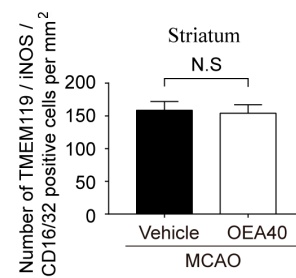

Figure S1. OEA treatment inhibits microglia M1 polarization in the peri-infarct of the cortex and striatum in WT but not KO mice at 3 days after MCAO. (A) Representative immunofluorescence images and quantification of TMEM119, iNOS and CD16/32 in the peri-infarction of WT mice on day 3 after MCAO. (B) Representative immunofluorescence images and quantification of TMEM119, iNOS and CD16/32 in the peri-infarction of KO mice on day 3 after MCAO. The data are the means  $\pm$  SEM. n = 5 per group.  $^{**}p < 0.01$  vs MCAO + vehicle group; N.S = No Significance. Scale Bar=100  $\mu$ m.



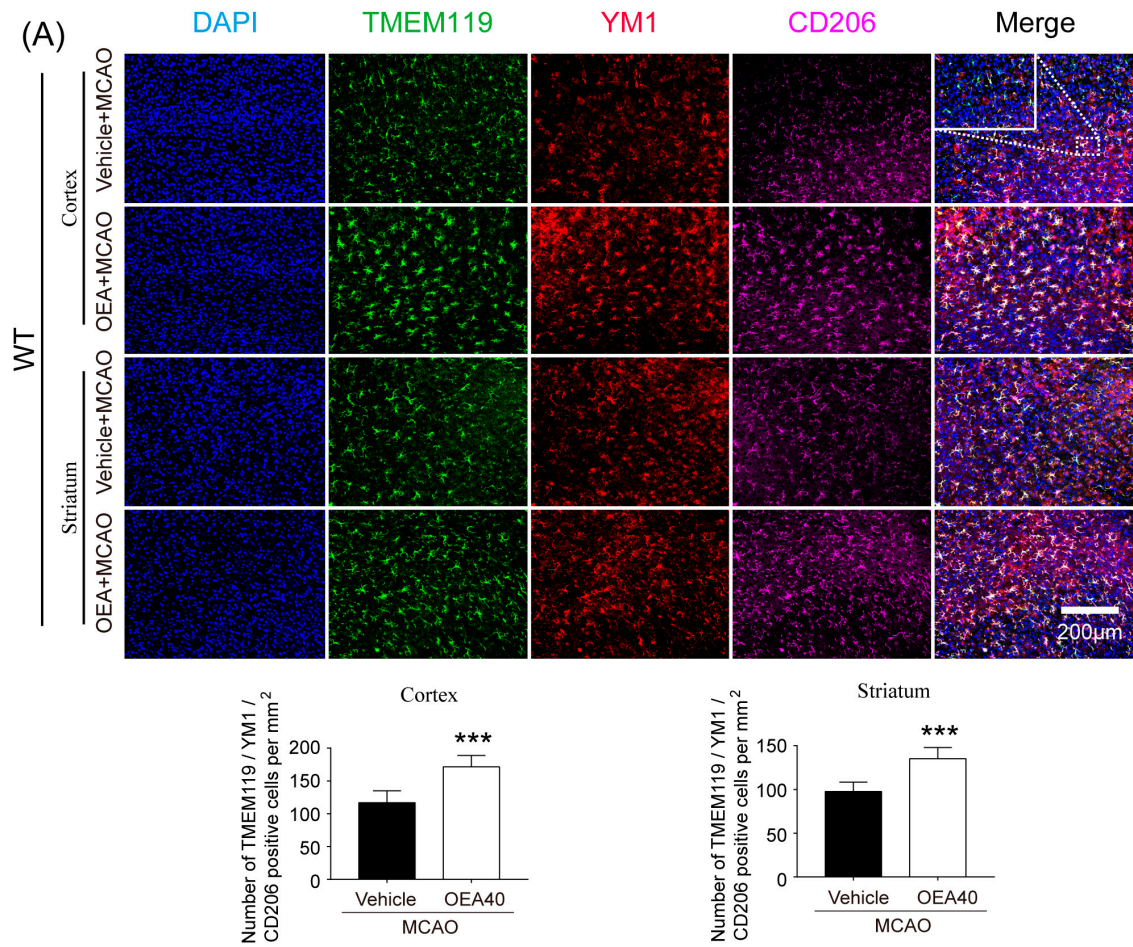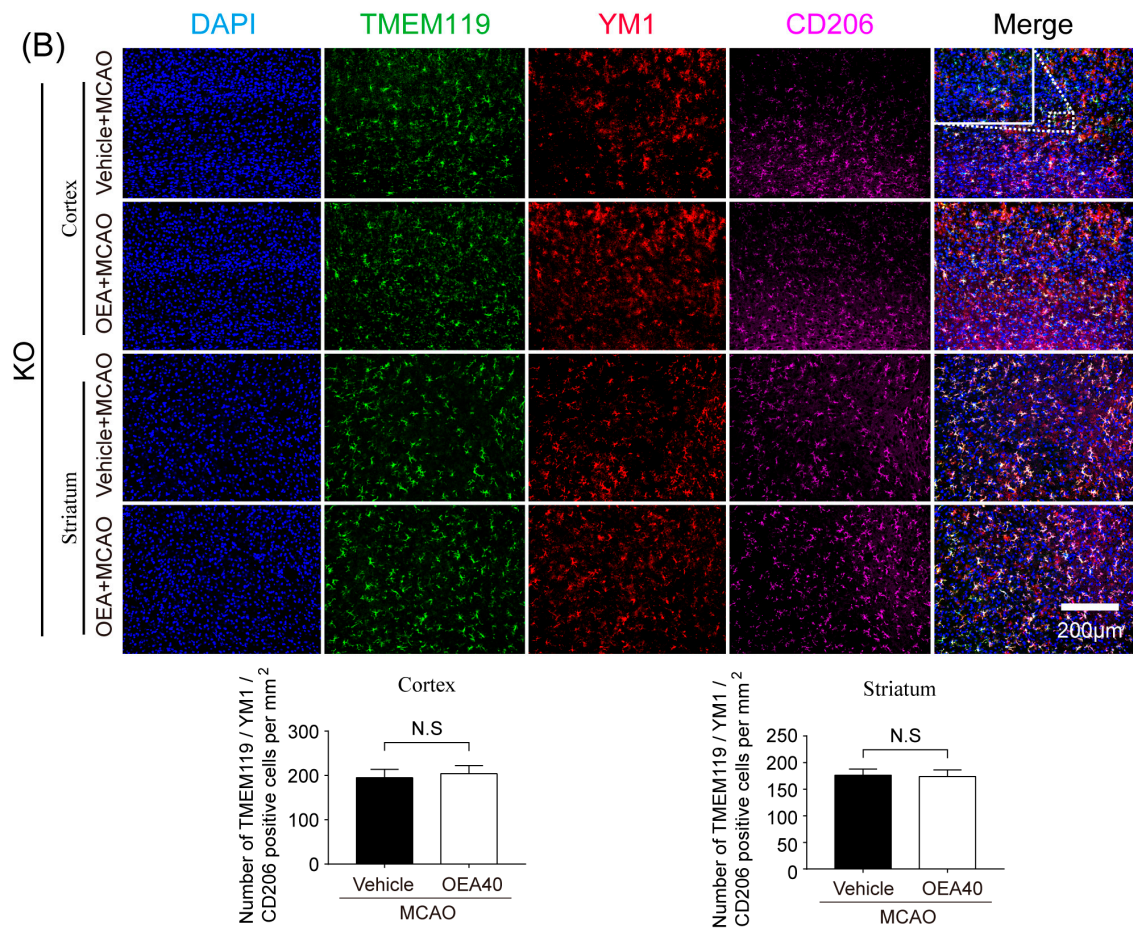

Figure S2. OEA treatment promotes microglia M2 polarization in the peri-infarct of the cortex and striatum in WT but not KO mice at 3 days after MCAO. (A) Representative immunofluorescence images and quantification of TMEM119, YM1 and CD206 in the peri-infarction of WT mice on day 3 after MCAO. (B) Representative immunofluorescence images and quantification of TMEM119, YM1 and CD206 in the peri-infarction of KO mice on day 3 after MCAO. The data are the means  $\pm$  SEM.  $n = 5$  per group. \*\*\* $p < 0.001$  vs MCAO + vehicle group; N.S = No Significance. Scale Bar=100  $\mu$ m.

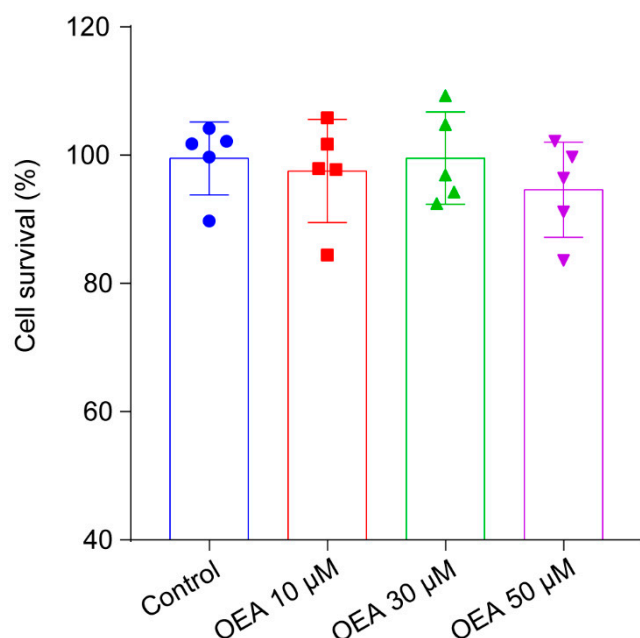

Figure S3. Effects of OEA on BV2 cells viability. BV2 cells were cultured with different concentrations of OEA (10, 30, and 50  $\mu$ M) for 24 h. Cell viability was assessed using an MTT assay. The values are presented as means  $\pm$  SEM of five independent experiments performed in duplicate ( $n = 5$ ). # $p < 0.05$  vs. control group.

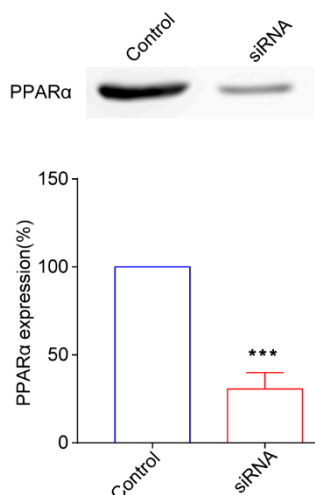

Figure S4. BV2 cells were transiently transfected with PPAR $\alpha$  siRNA for 24 h, and the protein expression of PPAR $\alpha$  were subsequently measured by western blot. The values are presented as means  $\pm$  SEM of five independent experiments performed in duplicate ( $n = 5$ ). \*\*\* $p < 0.001$  vs. control group.

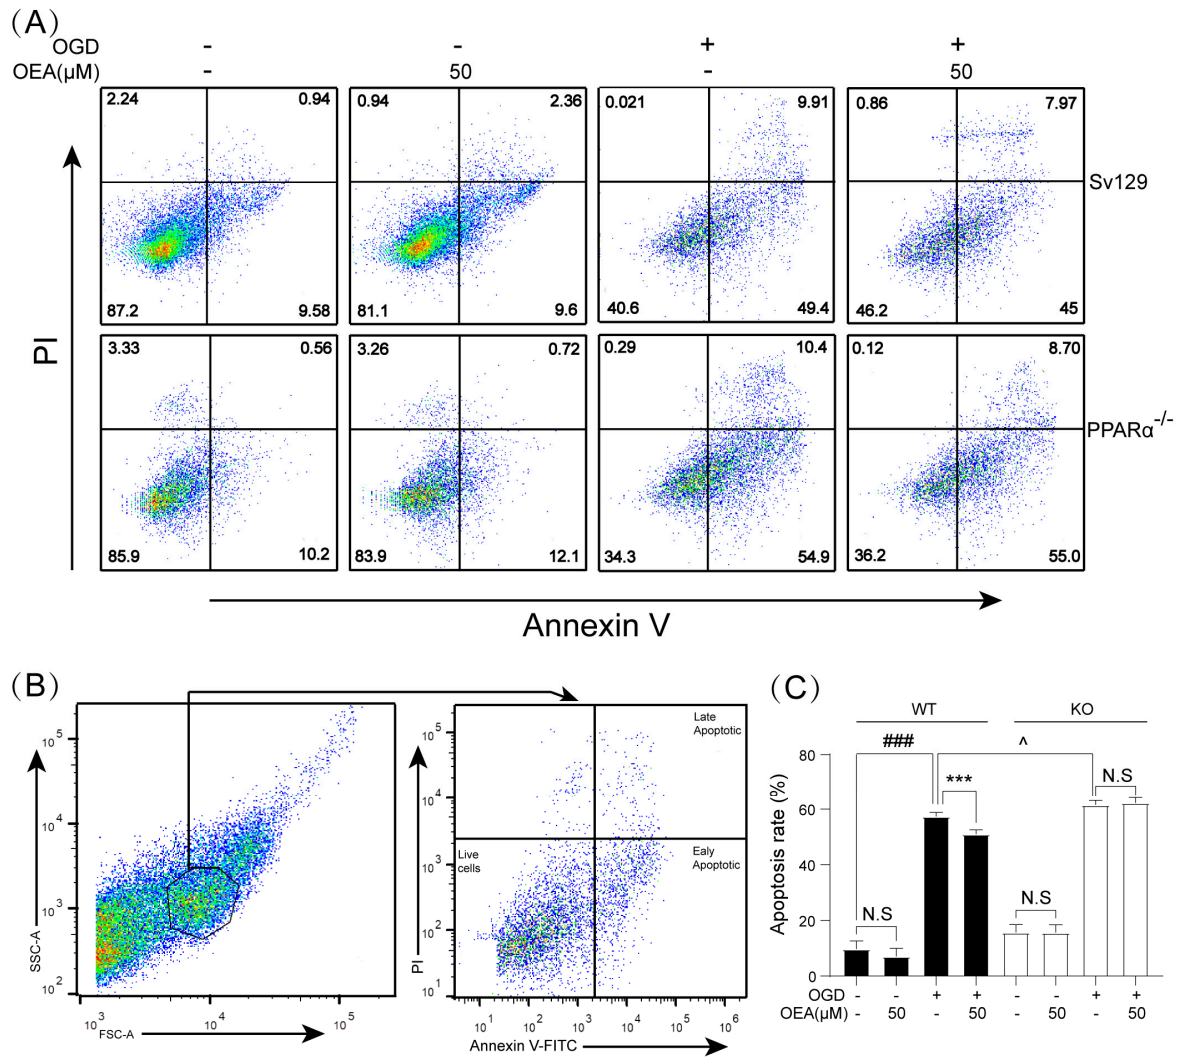

Figure S5. OEA treatment protects against neuronal apoptosis after OGD-treated in N/G co-cultures through PPAR $\alpha$ . (A) Neuronal apoptosis was assessed with flow cytometry using annexin V-FITC staining. (B and C) The relative apoptosis ratio was analyzed. The data are presented as the mean  $\pm$  SEM. N = 5. Each experiment was repeated 3 times. ### $p$  < 0.001 vs. Control group, \*\*\* $p$  < 0.001 vs. OGD group, ^ $p$  < 0.05 vs. WT OGD group
